# Supplementary material for: Physicochemical, Quality and Flavor Characteristics of Starch Noodles with Auricularia cornea var. Li. Powder
Source: MDPI journal article supplement (doi:10.3390/foods13081185), 2024-04-12
Supplement: s1 [file s1]

**Table S1.** Effect of *Auricularia cornea* var. *Li.* (AU) powder on comprehensive scores (texture score and sensory score).

| Additive amount (%) | Comprehensive scores    |
|---------------------|-------------------------|
| 1.6                 | 62.62±3.90 <sup>d</sup> |
| 3.2                 | 65.09±4.07 <sup>b</sup> |
| 4.8                 | 71.41±4.28 <sup>a</sup> |
| 6.4                 | 63.31±4.39 <sup>c</sup> |
| 8.0                 | 56.26±4.58 <sup>e</sup> |

<sup>a</sup> All values are means of triplicate determinations ± SD. Means within columns with different letters are significantly different ( $p < 0.05$ ).

#### *1.1.1 Texture determination*

Firstly, starch noodles of 10 cm in length were cooked in boiling water. Following that, the noodles were transferred to a bowl of cold water for a duration of 20 seconds. Once removed from the water, absorbent paper was utilized to blot the surface moisture of the starch noodles. Subsequently, the starch noodles were spread out on the operating platform, ensuring its smoothness for the entire testing procedure.

To evaluate the texture of the starch noodles, a TA XTPlus Texture Analyzer (Stable Micro Systems, Goldalming, UK) equipped with a P/36R cylindrical probe was utilized. The pre-test, test, and post-test speeds were set at 2, 1, and 1 mm/s, respectively. A trigger force of 5 g and strain of 50% were applied.

#### *1.1.2 Sensory evaluation*

A sensory evaluation of the cooked starch noodles was carried out by a panel of 10 experts. The sensory evaluation criteria were based on a combination of GBT15682-2008 standards and were further adjusted to align with the specific

characteristics of the starch noodles. This evaluation encompassed aspects such as apparent color (20 points), visual appearance (20 points), aroma (20 points), and taste (40 points), with a maximum cumulative score of 100.

As displayed in Table S1, using comprehensive scores (texture score and sensory score) as scoring indicators, the optimal addition amount of *Auricularia cornea var. Li.* (AU) powder was determined to be 4.8%.

**Table S2.** Orthogonal experimental design of starch noodles quality improver.

| Batch | Factor |    |    | Response |
|-------|--------|----|----|----------|
|       | CMC-Na | SA | TS |          |
| 1     | 1      | 1  | 1  | 0.358    |
| 2     | 1      | 2  | 2  | 0.367    |
| 3     | 1      | 3  | 3  | 0.308    |
| 4     | 2      | 2  | 3  | 0.412    |
| 5     | 2      | 3  | 1  | 0.391    |
| 6     | 2      | 1  | 2  | 0.382    |
| 7     | 3      | 3  | 2  | 0.302    |
| 8     | 3      | 1  | 3  | 0.283    |
| 9     | 3      | 2  | 1  | 0.322    |

<sup>a</sup> CMC-Na: Sodium carboxymethyl cellulose, SA: sodium alginate, TS: Table Salt.

<sup>b</sup> The response value represents the difference between cohesiveness and resilience.

## 1.2 Orthogonal optimization design

Building upon the results of the single-factor test, three key factors were chosen for further optimization testing: CMC-Na addition (%), SA addition (%), and TS addition (%). Simultaneously, three distinct levels were established for each of these factors, also based on the single-factor approach. Referring to Table S2, the optimal addition amounts of three improvers were obtained as follows: CMC-Na (0.6%), SA (0.4%), and TS (0.6%).

**Table S3.** Peak volume data for all compounds within each sample (Corresponds to Gallery Plot in GC-IMS).

| Compounds                | Category     | F1-1  | F1-2  | F1-3  | F2-1  | F2-2  | F2-3  |
|--------------------------|--------------|-------|-------|-------|-------|-------|-------|
| acetic acid-M            | Acids        | 605   | 576   | 552   | 502   | 489   | 502   |
| Ethyl lactate-M          | Esters       | 167   | 626   | 734   | 985   | 981   | 976   |
| Ethyl lactate-D          | Esters       | 16    | 119   | 157   | 725   | 883   | 974   |
| Ethyl hexanoate-M        | Esters       | 89    | 112   | 119   | 563   | 544   | 579   |
| Ethyl hexanoate-D        | Esters       | 13    | 14    | 15    | 405   | 413   | 512   |
| 1-Butanol-M              | Alcohols     | 860   | 813   | 801   | 410   | 416   | 370   |
| 1-Butanol-D              | Alcohols     | 974   | 927   | 908   | 781   | 764   | 822   |
| Hexanal-M                | Aldehyde     | 756   | 726   | 707   | 312   | 314   | 298   |
| Hexanal-D                | Aldehyde     | 1755  | 1782  | 1786  | 916   | 861   | 800   |
| Ethanol                  | Alcohols     | 1724  | 1740  | 1737  | 1814  | 1780  | 1771  |
| butyl acetate-M          | Esters       | 537   | 546   | 547   | 294   | 295   | 261   |
| butyl acetate-D          | Esters       | 182   | 194   | 206   | 230   | 207   | 167   |
| 4-Methyl-2-pentanone     | Ketones      | 539   | 559   | 538   | 1576  | 1583  | 1626  |
| Pentanal-M               | Aldehyde     | 418   | 402   | 396   | 33    | 31    | 34    |
| pentanal-D               | Aldehyde     | 478   | 491   | 470   | 24    | 19    | 14    |
| 2-Ethylfuran             | Heterocycles | 536   | 556   | 540   | 368   | 345   | 323   |
| 2-Methylpentanal         | Aldehyde     | 1117  | 1401  | 1363  | 1136  | 1164  | 50    |
| propanal-M               | Aldehyde     | 935   | 964   | 964   | 958   | 935   | 852   |
| propanal-D               | Aldehyde     | 2042  | 2099  | 2118  | 2007  | 1901  | 1734  |
| Acetone                  | Ketones      | 2935  | 2954  | 2943  | 2971  | 2949  | 3238  |
| E-2-Pentenal-M           | Aldehyde     | 930   | 929   | 920   | 376   | 361   | 331   |
| E-2-Pentenal-D           | Aldehyde     | 109   | 141   | 145   | 179   | 161   | 200   |
| Nonanal                  | Aldehyde     | 61    | 62    | 67    | 56    | 59    | 61    |
| E-2-heptenal             | Aldehyde     | 28    | 69    | 73    | 119   | 124   | 160   |
| E-2-hexenal              | Aldehyde     | 64    | 78    | 71    | 92    | 86    | 99    |
| 1-Propanol-M             | Alcohols     | 425   | 412   | 399   | 26    | 25    | 14    |
| 1-Propanol-D             | Alcohols     | 87    | 82    | 86    | 97    | 84    | 127   |
| Tetrahydrofuran          | Heterocycles | 516   | 518   | 511   | 1019  | 859   | 1262  |
| Ethane-1-1-diethoxy-     | Aldehyde     | 411   | 397   | 366   | 415   | 347   | 201   |
| ButyrAldehyde-M          | Aldehyde     | 450   | 454   | 439   | 468   | 336   | 355   |
| ButyrAldehyde-D          | Aldehyde     | 232   | 255   | 253   | 267   | 250   | 157   |
| Ethyl Acetate-M          | Esters       | 747   | 706   | 681   | 634   | 446   | 470   |
| Ethyl acetate-D          | Esters       | 3088  | 3109  | 3077  | 3060  | 3045  | 3037  |
| 2-Propanol-M             | Alcohols     | 482   | 418   | 401   | 234   | 144   | 288   |
| 2-Propanol-D             | Alcohols     | 181   | 162   | 154   | 120   | 115   | 312   |
| isobutyl acetate         | Esters       | 188   | 208   | 174   | 80    | 74    | 94    |
| Methyl 2-methylbutanoate | Esters       | 98    | 100   | 93    | 150   | 133   | 164   |
| Ethyl butyrate-M         | Esters       | 93    | 99    | 86    | 236   | 222   | 300   |
| Ethyl butanoate-D        | Esters       | 11    | 14    | 9     | 247   | 219   | 285   |
| 2-Butanol-M              | Alcohols     | 142   | 131   | 122   | 12    | 56    | 77    |
| 2-butanol-D              | Alcohols     | 17    | 15    | 20    | 116   | 119   | 143   |
| 1-Propanol-2-methyl      | Alcohols     | 14    | 13    | 12    | 104   | 97    | 134   |
| 2-methyl-2-pentenal      | Aldehyde     | 13    | 17    | 19    | 163   | 155   | 187   |
| n-heptanal-M             | Aldehyde     | 1061  | 1319  | 1381  | 1883  | 1844  | 1881  |
| heptanal-D               | Aldehyde     | 8     | 12    | 14    | 76    | 68    | 102   |
| E-2-pentenal             | Aldehyde     | 164   | 182   | 171   | 785   | 784   | 842   |
| butyl butanoate          | Esters       | 131   | 129   | 121   | 57    | 53    | 55    |
| acetic acid-D            | Acids        | 35    | 32    | 26    | 22    | 26    | 29    |
| Pentanol                 | Alcohols     | 113   | 131   | 140   | 128   | 108   | 120   |
| 2-Butanone-M             | Ketones      | 471   | 464   | 459   | 489   | 206   | 141   |
| 2-Butanone-D             | Ketones      | 245   | 269   | 277   | 350   | 329   | 310   |
| 52                       |              | 1113  | 1148  | 1152  | 1116  | 1096  | 311   |
| 53                       |              | 276   | 141   | 129   | 163   | 179   | 692   |
| 54                       |              | 60    | 60    | 63    | 300   | 292   | 283   |
| 55                       |              | 30    | 22    | 30    | 228   | 203   | 181   |
| 56                       |              | 21    | 18    | 19    | 102   | 84    | 111   |
| 57                       |              | 91    | 109   | 99    | 96    | 92    | 19    |
| 58                       |              | 35    | 36    | 32    | 135   | 137   | 151   |
| 59                       |              | 83    | 49    | 50    | 55    | 41    | 219   |
| 60                       |              | 31    | 24    | 18    | 26    | 28    | 139   |
| 61                       |              | 97    | 96    | 98    | 230   | 170   | 241   |
| 62                       |              | 48    | 62    | 70    | 74    | 212   | 255   |
| 63                       |              | 28    | 40    | 49    | 32    | 154   | 187   |
| 64                       |              | 74    | 41    | 47    | 52    | 49    | 181   |
| 65                       |              | 91    | 103   | 106   | 213   | 194   | 175   |
| 66                       |              | 12    | 34    | 36    | 38    | 190   | 208   |
| 67                       |              | 17    | 17    | 13    | 19    | 182   | 176   |
| Total                    |              | 29400 | 30528 | 30379 | 31949 | 31112 | 31370 |

<sup>a</sup> F1: Control group,F2: Experimental group.
